# Supplementary material for: Surface decoration of graphene by grafting polymerization using graphene oxide as the initiator
Source: Royal Society of Chemistry journal article supplement (doi:10.1039/c2jm13667h), 2012-01-01
Supplement: c2jm13667h.pdf [file c2jm13667h.pdf]

## Supplementary Information

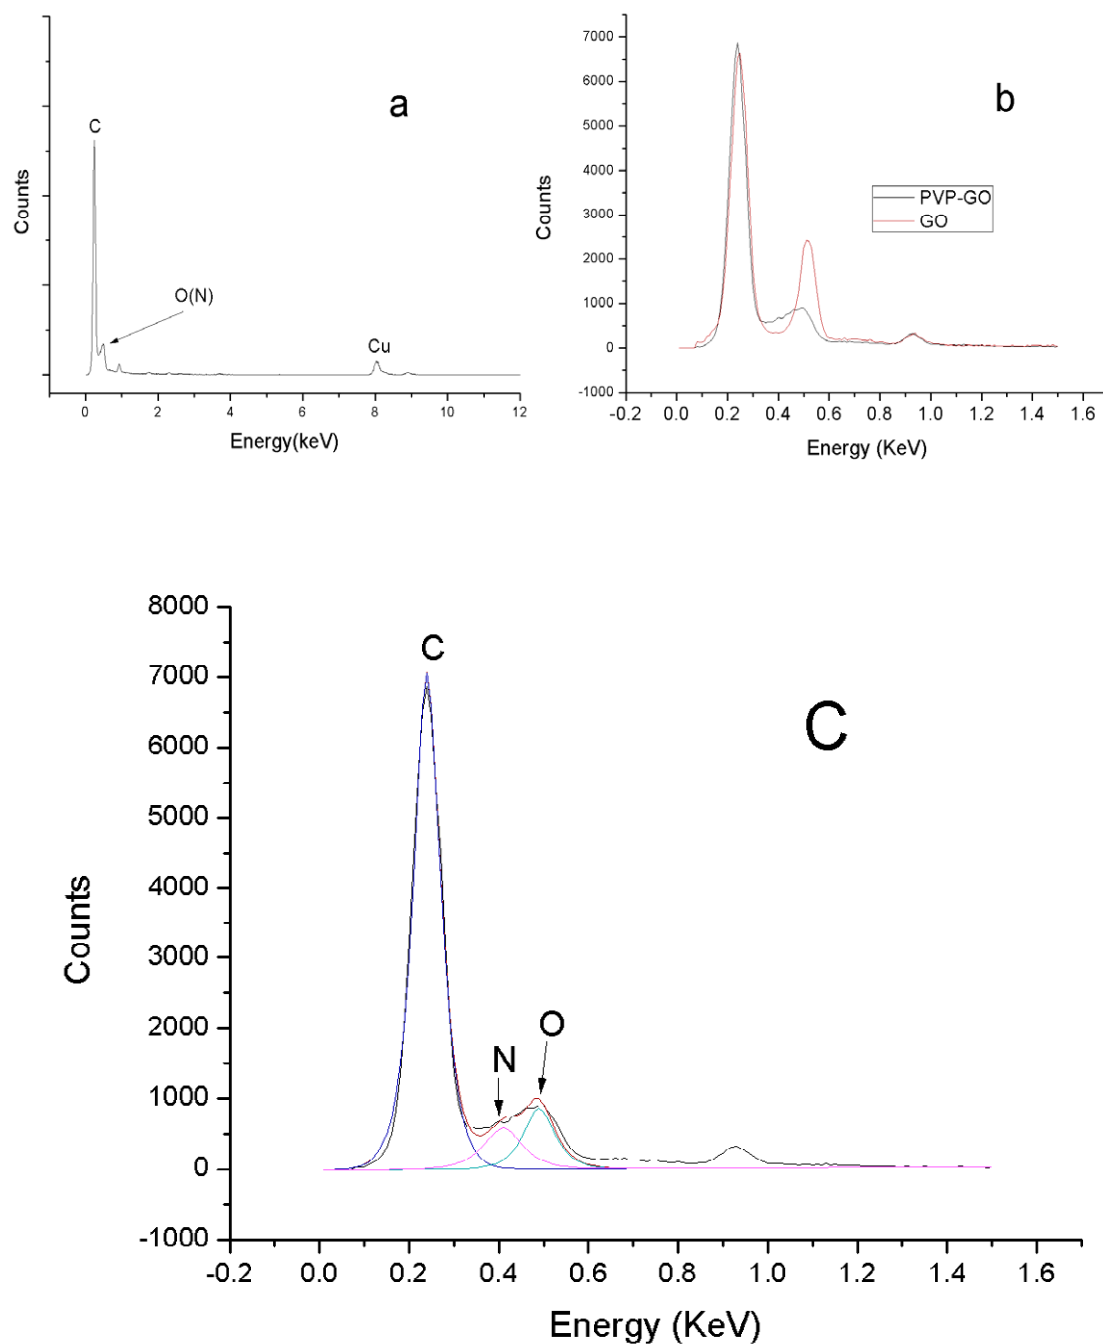

**Fig. S1** (a)EDX spectrum of PVP-GO (b) EDX spectrum of PVP-GO in comparison with that of GO in the range from 0 to 1.5 KeV (c) the spectrum of PVP-GO in the range from 0 to 0.8 KeV can be divided into three peaks corresponding to C(0.24KeV), N(0.41KeV) and O(0.49KeV), respectively. The EDX spectrum of PVP-GO indicates presence of N.

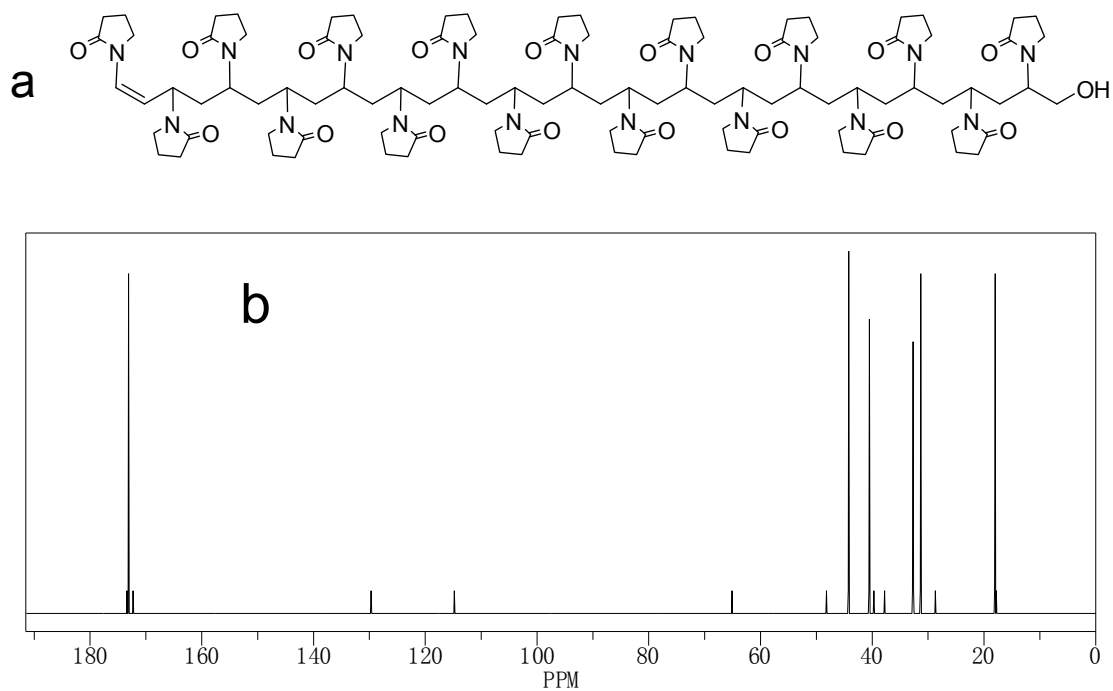

**Fig. S2** (a) Scheme of PVP with a hydroxyl end group and a double bond end group and (b) its <sup>13</sup>C-NMR spectrum estimated by Chemdraw Ultra.

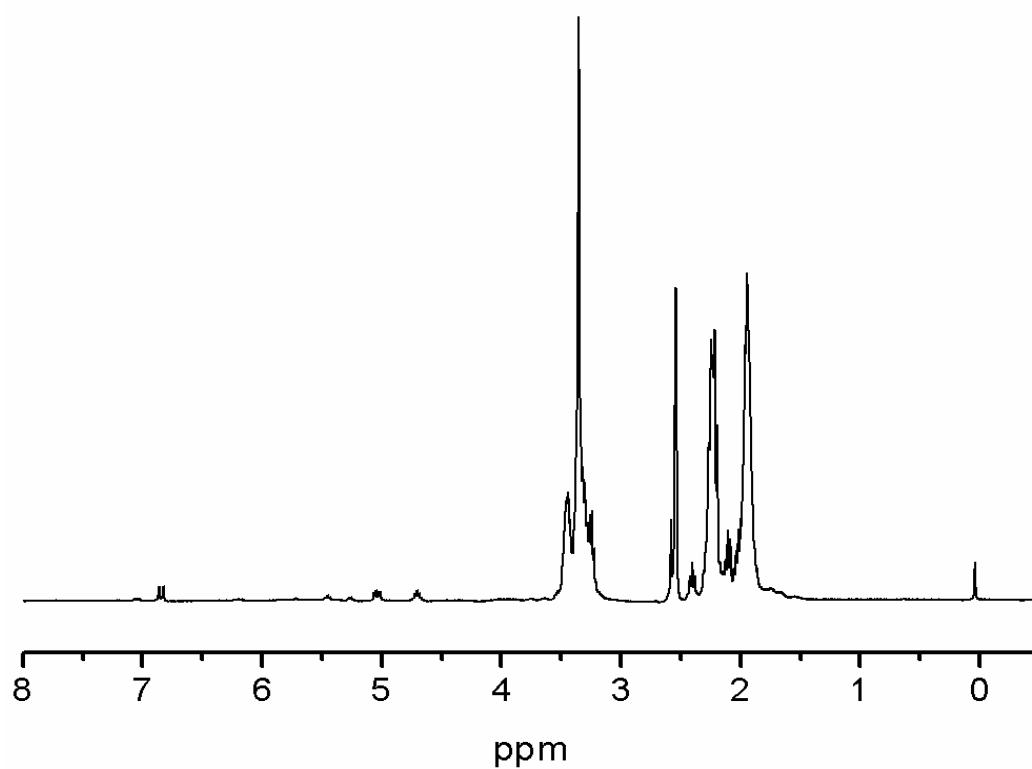

**Fig. S3** <sup>1</sup>H-NMR spectrum of free PVP. Peaks at around 6.84ppm indicate the presence of carbon double bonds.
